# Supplementary material
Source: PubMed Central journal article supplement (PMC1904167)
Supplement: pnas_0611636104_1.pdf [file pnas_0611636104_1.pdf]

|      |                           |             |               |                    |                   |            |
|------|---------------------------|-------------|---------------|--------------------|-------------------|------------|
|      | 10                        | 20          | 30            | 40                 | 50                |            |
| GapA | K                         | LKVAINGFGR  | IGRNFLRCWH    | GRKDSPLDVVVI       | NDTGGVKQA         | SHLLKYDSIL |
| GapB | -                         | -----       | -----         | -----V             | --S---S-          | T-----     |
|      | 60                        | 70          | 80            | 90                 | 100               |            |
| GapA | GTFDADVKTA                | GDSAISVDGKV | IKVVS DRNPV   | NLPWGD MGID        | LVIEGTGVFV        |            |
| GapB | ---K---II                 | DNETF-I---P | -----N-D-L    | K---AEL---         | I-----            |            |
|      |                           |             | <b>A</b>      |                    |                   |            |
|      | 110                       | 120         | 130           | 140                | 150               |            |
| GapA | DRDGAGKHLQ                | AGAKKVLITA  | PGKG-DIPT YVV | GVNEEGYTHA         | DT-IISNASCT       |            |
| GapB | -GP-----I-                | -----I---   | -A--S-----    | ---KD-G-D          | AN-----           |            |
|      | 160                       | 170         | 180           | 190                | 200               |            |
| GapA | TNCLAPFVKV                | LDQKFGI IKG | TMTTTHSYTG    | DQRLLDAS-H         | RDLRRARAAC        |            |
| GapB | -----                     | --EEL--V--  | -----         | -----              | -----A            |            |
|      |                           |             | <b>A</b>      | <b>A</b>           |                   |            |
|      | 210                       | 220         | 230           | 240                | 250               |            |
| GapA | <u>LNIVPTSTGA</u>         | AKAVALVLPN  | LKGKLN GIAL   | RVPTPNVSVV         | DLVVQVSKK-T       |            |
| GapB | <u>-----</u>              | ----S----Q  | -----         | -----              | ----NIE-VGV       |            |
|      | 260                       | 270         | 280           | 290                | 300               |            |
| GapA | FAEEVNAAFR                | ESADNELKGI  | LSVCDEPLVS    | IDFRCTDVSST        | IDSSLTMVM         |            |
| GapB | T--D--N---                | KA-AGP---V  | -D---I-----   | V----S-F---        | -----             |            |
|      | 310                       | 320         | 330           | 340                | 350               |            |
| GapA | GDDMVKVI AW               | YDNEWGY SQR | VVDLADIVAN    | KWQA               |                   |            |
| GapB | -G-----V--                | -----       | -----L---     | --PG <b>LEGSVA</b> | <b>SGDPLEDFCK</b> |            |
|      | 360                       |             |               |                    |                   |            |
| GapB | <b>DNPADEE</b> <b>CKL</b> | <b>YE</b>   |               |                    |                   |            |
|      | <b>N</b>                  | <b>QQ</b>   | <b>Q</b>      |                    |                   |            |
